# 1 **Widespread nociceptive maps in the human neonatal** 2 **somatosensory cortex.**

3  
4 Laura Jones<sup>1†</sup>, Madeleine Verriotis\*, Robert J. Cooper<sup>2</sup>, Maria Pureza Laudiano-  
5 Dray<sup>1</sup>, Mohammed Rupawala<sup>1</sup>, Judith Meek<sup>3</sup>, Lorenzo Fabrizi<sup>1</sup>, & Maria Fitzgerald<sup>1</sup>

6  
7 <sup>1</sup> Department of Neuroscience, Physiology & Pharmacology, University College London,  
8 London, WC1E 6BT, UK

9 <sup>2</sup> DOT-HUB, Department of Medical Physics & Biomedical Engineering, University College  
10 London, London, WC1E 6BT, UK

11 <sup>3</sup> Elizabeth Garrett Anderson Obstetric Wing, University College London Hospitals, London,  
12 WC1E 6DB, UK

13  
14 \***Current address:** Department of Developmental Neuroscience, University College London  
15 Great Ormond Street Institute of Child Health, London, WC1N 1EH, UK

16  
17 † **Corresponding Authors:** [m.fitzgerald@ucl.ac.uk](mailto:m.fitzgerald@ucl.ac.uk) and [laura.jones@ucl.ac.uk](mailto:laura.jones@ucl.ac.uk)

18  
19  
20  
21 **Running title:** Touch & pain topography in the human infant cortex

22 **No. of Pages:** 22

23 **No. of Figures:** 4

24 **No. of Tables:** 1

25 **No. of words Abstract:** 250

26 **No. of words Introduction:** 592

27 **No. of words Discussion:** 1500

28  
29 **Conflict of interest statement:** RJC holds financial interests in Gowerlabs Ltd, who  
30 produce the device used in this study. The authors declare no other conflict of interest in this  
31 study.

32  
33 **Acknowledgments:** This work was funded by the Medical Research Council UK  
34 (MR/M006468/1, MR/L019248/1, and MR/S003207/1). RJC is funded by EPSRC Fellowship  
35 EP/N025946/1

## 36 37 38 **Abstract**

39 Topographic cortical maps are essential for spatial localisation of sensory stimulation and  
40 generation of appropriate task-related motor responses. Somatosensation and nociception  
41 are finely mapped and aligned in the adult somatosensory (S1) cortex, but in infancy, when  
42 pain behaviour is disorganised and poorly directed, nociceptive maps may be less refined.  
43 We compared the topographic pattern of S1 activation following noxious (clinically required  
44 heel lance) and innocuous (touch) mechanical stimulation of the same skin region in  
45 newborn infants (n=32) using multi-optode functional near-infrared spectroscopy (fNIRS).  
46 Signal to noise ratio and overall activation area did not differ with stimulus modality. Within  
47 S1 cortex, touch and lance of the heel elicit localised, partially overlapping increases in  
48 oxygenated haemoglobin (HbO), but while touch activation was restricted to the heel area,  
49 lance activation extended into cortical hand regions. The data reveals a widespread cortical  
50 nociceptive map in infant S1, consistent with their poorly directed pain behaviour.

## 51 52 **Introduction**

53 Somatotopically organised cortical maps of activity evoked by innocuous or noxious  
54 mechanical stimulation allow us to localise our sense of touch or pain (Penfield and Boldrey,  
55 1937; Harding-Forrester and Feldman, 2018), and may also convey computational  
56 advantages in the relay of afferent information to higher brain areas (Thivierge and Marcus,  
57 2007). In adults, overlapping regions are involved in the cortical processing of noxious and  
58 innocuous mechanical stimulation (Kenshalo et al., 2000; Lui et al., 2008) and detailed fMRI  
59 analysis reveals a fine-grained somatotopy for nociceptive inputs in primary somatosensory  
60 cortex (SI) that are aligned with activation maps following tactile stimuli, suggesting  
61 comparable cortical representations for mechanoreceptive and nociceptive signals (Mancini  
62 et al., 2012).

63 A whole-body topographical map of innocuous mechanical stimulation develops in the  
64 sensorimotor cortices over the early postnatal period in rats, which represent the human final  
65 gestational trimester (Seelke et al., 2012). Distinct representations of the hands and feet can  
66 be observed from 31 weeks using fMRI (Dall'Orso et al., 2018), becoming increasingly  
67 localised by term age (Allievi et al., 2016). While haemodynamic responses to a clinically-  
68 required heel lance have been recorded from 28 weeks using functional near-infrared  
69 spectroscopy (Slater et al., 2006) and can be distinguished from innocuous mechanical  
70 evoked brain activity in EEG recordings from 34-35 weeks (Fabrizi et al., 2011), the source  
71 of this activity and topographic representation of these two modalities have not been  
72 mapped, or their alignment established, in the infant cortex.

73 Infant pain behaviour is exaggerated and disorganised in newborn rodents and human  
74 infants (Fitzgerald, 2005, 2015; Cornelissen et al., 2013). Poor spatial tuning of nociceptive  
75 reflexes and receptive fields is a feature of the developing somatosensory system, followed  
76 by the emergence of adult organisation through activity-dependent refinement of synaptic  
77 connections (Beggs et al., 2002; Schouenborg, 2008; Koch and Fitzgerald, 2013). We  
78 hypothesised that this developmental process is reflected in ascending nociceptive signals  
79 to SI, leading to widespread cortical activation and poor spatial localisation of noxious events  
80 in early life.

81 To test this hypothesis, we used multiopode functional near-infrared spectroscopy (fNIRS)  
82 to map nociceptive and innocuous mechanoreceptive activity across the infant sensorimotor  
83 cortex. fNIRS is a non-invasive measure of cerebral haemodynamic changes which can be  
84 performed at the bedside, using skin-to skin holding in a naturalistic hospital setting during  
85 clinically required procedures. Using the temporal and spatial profiles of haemodynamic  
86 responses to a noxious skin lance and an innocuous touch of the hand and the heel, we  
87 show that haemodynamic activity elicited by noxious and innocuous mechanical stimulus  
88 have partially overlapping topographies in the human infant S1 cortex but that the two maps  
89 are not aligned. Noxious stimulation of the heel in the newborn evokes a more widespread  
90 cortical activation than innocuous stimulation, that extends into inferior regions of S1,  
91 normally associated with representation of the hand.

92

## 93 **Results**

### 94 ***Hand and heel touch evoked activity is somatotopically organised in the newborn*** 95 ***infant S1 cortex***

96 We first established the cortical topography of touch activation in newborn infants by  
97 mapping the extent of activation in the contralateral somatosensory (S1) cortex following  
98 innocuous mechanical stimulation (touch) of the hand and of the heel. **Figure 1a** and **1b**  
99 show a significant and localised increase in average [HbO] in contralateral optode channels  
100 following touch of each body area (n=11, hand touch; n=16 heel touch). Touch stimulation  
101 of the hand elicited significant increases in five channels, with a maximum change (0.31  $\mu$ M  
102 at 16.9 s post-stimulus) at the channel corresponding to the FCC3 position of the 10:5  
103 placement system (Figure 4), while touch of the foot elicited significant increases in six  
104 channels, with a maximum change (0.30  $\mu$ M at 15.8 s) at the channel corresponding to the  
105 CPP1 10:5 position. The somatotopically localised increases in [HbO] were accompanied by

106 a widespread decrease in [Hb] over the whole peri-rolandic area (hand: significant  
 107 decreases in eight channels [peak change:  $-0.21 \mu\text{M}$  at 17.7 s]; foot: significant decreases in  
 108 nine channels, including control channel [peak change:  $-0.20 \mu\text{M}$  at 11.2 s]). An inverse  
 109 response (significant decrease in [HbO], significant increase in [Hb], or both) was mostly  
 110 restricted to channels surrounding the hand and foot areas of the S1, respectively. Individual  
 111 channel data is shown in **Figure 1 – Source Data 1**.

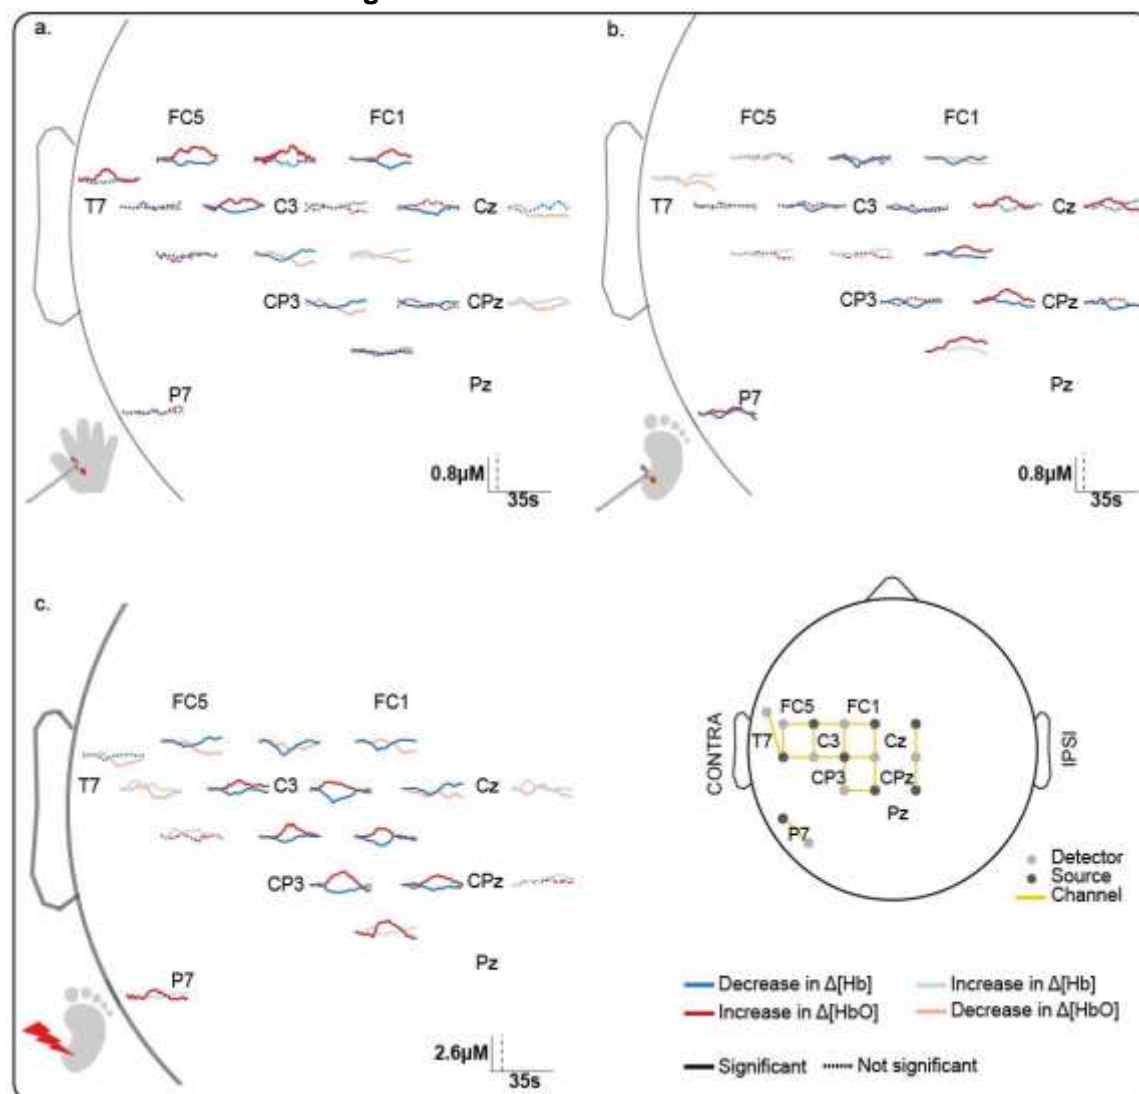

112 **Figure 1. Channel-wise haemodynamic response following innocuous and noxious**  
 113 **mechanical stimulation of hand and heel. Average  $\Delta[\text{HbO}]$  (red) and  $\Delta[\text{Hb}]$  (blue) during**  
 114 **(a) hand touch ( $n=11$ ), (b) heel touch ( $n=16$ ) and (c) heel lance ( $n=11$ ).** Channels with  
 115 **significant increases in [HbO] and decreases in [Hb] (i.e. canonical response) during the**  
 116 **activation period are shown with solid dark lines, inverse responses are shown with solid**  
 117 **pale lines, and non-significant changes are shown with dotted lines. Black vertical line**  
 118 **represents stimulus onset. Note the difference in the scale bar between touch and lance. For**  
 119 **channels where a significant canonical and inverse response was found at different**  
 120 **latencies, the canonical response only is depicted. (Details of individual channel responses**  
 121 **are in **Figure 1 – Source Data 1**)**

123 Image reconstruction of the channel data (Figure 2a and 2b) shows that the topography of  
 124 touch activation in the newborn infant S1 is consistent with the known adult S1 topography:  
 125 the area representing the foot lies in the superomedial postcentral gyrus, while the area for  
 126 the hand is more inferior (Penfield and Boldrey, 1937; Harding-Forrester and Feldman,  
 127 2018; Willoughby et al., 2020).

128 **Noxious lance of the heel elicits widespread activation extending into inferior SI**

129 We next mapped activation in the contralateral S1 following a noxious, clinically required,  
130 lance stimulus to the heel in newborn infants. The average channel response (**Figure 1c**)  
131 and the image reconstruction (**Figure 2c**) show the significant and widespread increase in  
132 [HbO] following lancing the heel, which extends beyond the somatotopic area for heel touch  
133 to encompass inferior areas of SI, which were associated with touch of the hand.  
134 Heel lance elicited significant increases in [HbO] in eight channels (including the control  
135 channel), with a maximum increase (0.96  $\mu\text{M}$  at 14.5 s) at the channel corresponding to the  
136 CP2h 10:5 position. Four of the channels with a significant increase in [HbO] following the  
137 lance, also had a significant increase in [HbO] following touch of the foot. Notably one  
138 channel also displayed a significant increase following touch of the hand. The  
139 accompanying decrease in [Hb] was widespread (significant decreases in 11 channels; peak  
140 change 1.03  $\mu\text{M}$  at 9.1 s), and an inverse response was found in all channels surrounding  
141 those with a canonical response (**Figure 1c and 2c**).  
142

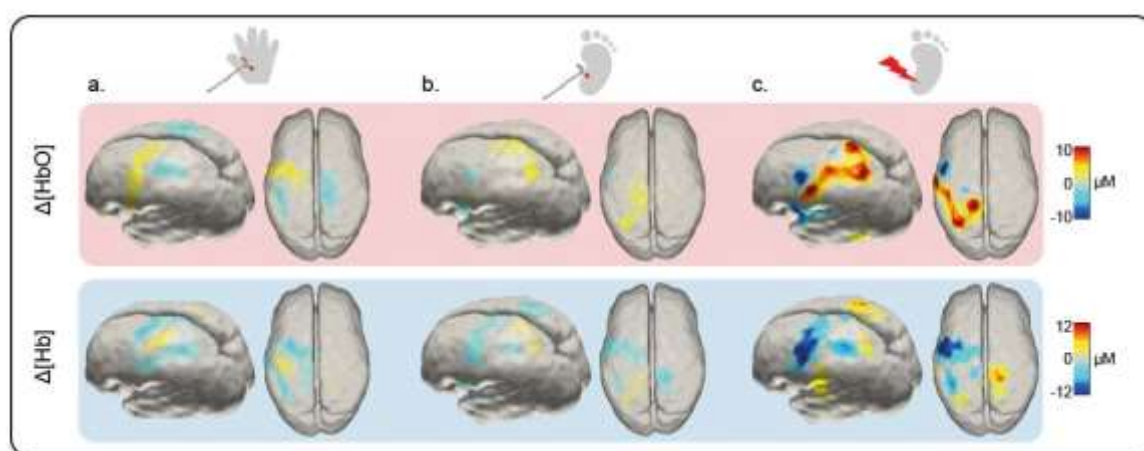

143 **Figure 2. Image reconstruction at peak latency of the  $\Delta[\text{HbO}]$  and  $\Delta[\text{Hb}]$  response to an innocuous (touch) and noxious (lance) mechanical stimulation of hand and heel.**  
144 **Significant changes (compared to baseline) in  $\Delta[\text{HbO}]$  (top row) and  $\Delta[\text{Hb}]$  (bottom row)**  
145 **following (a) hand touch ( $n=11$ ), (b) heel touch ( $n=16$ ) and (c) heel lance ( $n=11$ ).**  
146  
147

148 **Newborn infant nociceptive maps are not somatotopically aligned with touch maps**

149 To test whether the widespread activity evoked by heel lance within S1 represents a true  
150 difference in the somatotopic mapping of touch and nociception, we compared the signal to  
151 noise, the individual channel activation and the overall spatial dimensions of haemodynamic  
152 activity evoked by the two stimulus modalities applied to the heel.

153 Heel lance elicited a significantly larger increase in [HbO] and decrease in [Hb] compared to  
154 heel touch (maximum  $\Delta[\text{HbO}]$ : 15.23 vs 4.13  $\mu\text{M}$ ,  $p=.007$ ; maximum  $\Delta[\text{Hb}]$ : -22.87 vs -4.34  
155  $\mu\text{M}$ ,  $p<.001$ ; **Figure 3b, Figure 3 – figure supplement 1**). However, the signal to noise of  
156 the lance heel activation was not higher than that of heel touch evoked activity (see  
157 Methods). Furthermore, the difference in amplitude between lance and touch was not  
158 accompanied by a difference in overall area of cortical activation evoked by the two stimuli  
159 (**Figure 3b and Figure 3 – Source Data 1**). Neither the location nor latency of peak  
160 activation differed between the two stimulus modalities ( $\Delta[\text{HbO}]$ : distance between peaks =  
161 1.65 mm,  $p=.776$ ; difference in peak latency = 1.7 s [14.1 vs 15.8 s],  $p=.356$ ;  $\Delta[\text{Hb}]$ : distance  
162 between peaks = 0 mm,  $p=.957$ ; difference in peak latency = 1.7 s [9.6 vs 11.3 s],  $p=.292$ ).  
163 Only the spread of the peak  $\Delta[\text{HbO}]$  was significantly larger following noxious heel lance ( $\Delta$   
164 [HbO] FWHM area: 66.63 vs 52.96  $\text{mm}^2$ ,  $p=.015$ ;  $\Delta[\text{Hb}]$  FWHM area: 87.86 vs 83.10  $\text{mm}^2$ ,  
165  $p=.204$ ). (Figure 3 – figure supplement 1). The key difference between the two patterns of

166 activation is that the foot touch response is limited to the areas of the S1/M1 associated with  
 167 the foot, whereas the lance response extends towards other more ventral regions of S1.

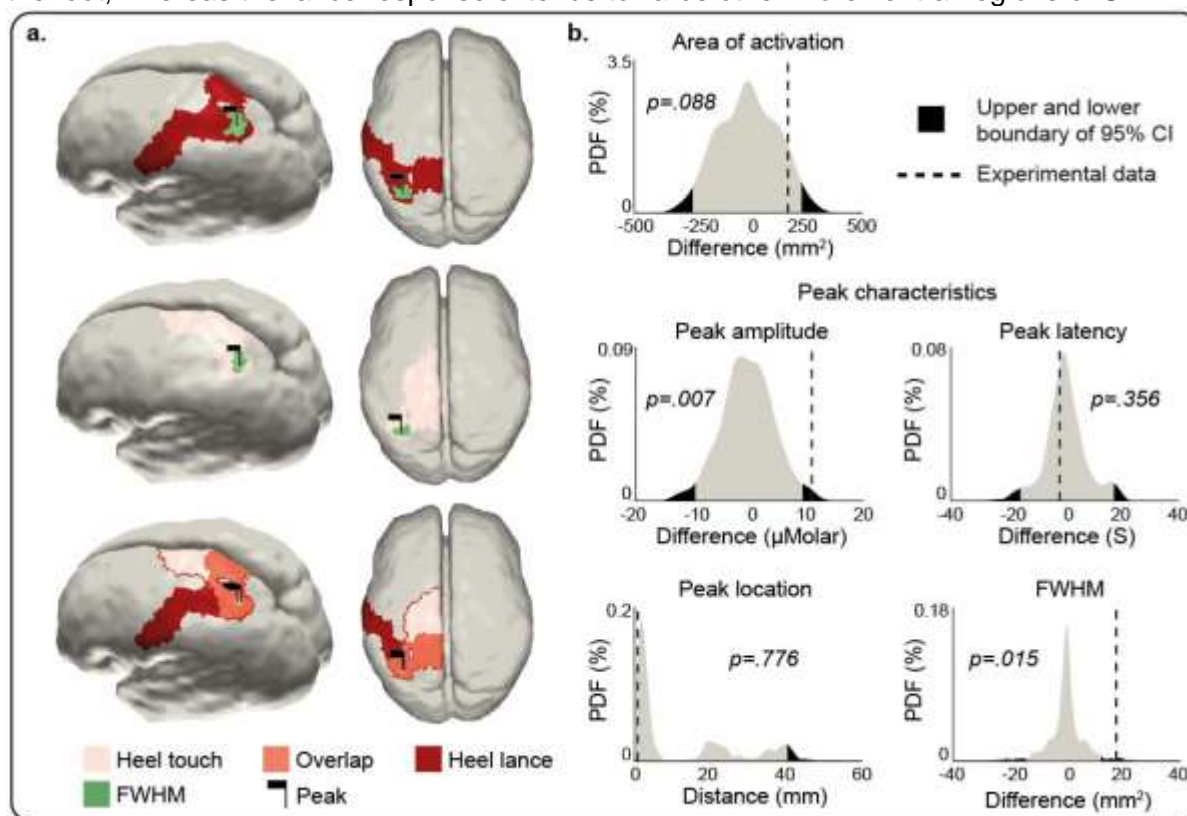

168  
 169 **Figure 3. Comparison of the peak and area of activation of the  $\Delta[HbO]$  response to an**  
 170 **innocuous (touch) and noxious (lance) mechanical stimulation of the heel. (a) Area of**  
 171 **significant  $\Delta[HbO]$  changes following heel lance (red), heel touch (pink) and both (orange).**  
 172 **Black flags demark the location of peak changes and green areas the extent of their full-width**  
 173 **half-maximum (FWHM). (b) Statistical position of experimental differences between heel**  
 174 **touch and lance in peak amplitude, FWHM, latency and location, and area of significant**  
 175  **$\Delta[HbO]$  changes in respect to non-parametric null distributions obtained with bootstrapping**  
 176 **and phase scrambling. The equivalent plots for  $\Delta[Hb]$  are shown in **Figure 3 - figure****  
 177 **supplement 1 and Figure 3 - source data 1.**

## 178 Discussion

### 179 **A widespread nociceptive topographic map in infant S1 that overlaps but is not** 180 **aligned to the innocuous mechanoreceptive map**

182 Somatosensory maps of cortical activity evoked by a cutaneous tactile or noxious stimulus  
 183 provide a framework for localising the sense of touch or pain (Treede et al., 1999; Thivierge  
 184 and Marcus, 2007). The adult primate S1 has a defined somatotopic organization of tactile  
 185 and nociceptive cortical receptive fields (Andersson et al., 1997; Kenshalo et al., 2000)  
 186 including spatially precise cortical maps of A $\delta$  and A $\beta$  afferent fibre input (Chen et al., 2011).  
 187 Human fMRI studies show that adult somatotopic maps of noxious and non-noxious  
 188 mechanical stimulation substantially overlap (Lui et al., 2008) and detailed analysis reveals a  
 189 fine-grained somatotopy for nociceptive inputs in primary somatosensory cortex (S1) that are  
 190 highly aligned with maps of innocuous tactile stimuli, suggesting comparable cortical  
 191 representations for mechanoreceptive and nociceptive signals (Mancini et al., 2012). Here  
 192 we have shown that this comparable representation is not present in the newborn infant S1  
 193 cortex.

194 Noxious mechanical stimulation evokes a larger peak increase in  $\Delta[\text{HbO}]$  and decrease in  
195  $\Delta[\text{Hb}]$  compared to innocuous stimulation of the same body area at comparable location and  
196 latency as reported elsewhere (Bartocci et al., 2006; Slater et al., 2006; Verriotis et al.,  
197 2016b). The fact that the noxious activation is greater than the touch evoked activity (clearly  
198 seen because fNIRS provides scaled maps of the physiologically meaningful parameter,  
199 haemoglobin concentrations, unlike BOLD-fMRI) is presumably due to greater depolarisation  
200 and spike activity within the activated areas. However, it does not explain the differing  
201 topography reported here. The signal to noise ratio is not larger following noxious  
202 stimulation as we averaged data from repeated touches to compare with a single lance  
203 stimulus. Furthermore, the overall area of brain activity does not differ significantly between  
204 touch and lance of the heel, it is only that the areas of activation of the responses are not  
205 aligned. Within S1 itself, the infant has a distinct somatotopic map for touch, similar to that  
206 described in adults, with the area representing the foot lying in the superomedial postcentral  
207 gyrus, and the area for the hand located more inferiorly (Penfield and Boldrey, 1937; Blake  
208 et al., 2002; Akselrod et al., 2017), consistent with previous reports in newborn infants  
209 (Dall'Orso et al., 2018). Noxious heel lance, on the other hand, evokes a widespread activity  
210 within S1, peaking in the same area of the superomedial postcentral gyrus as touch activity,  
211 but extending to the hand representation area. The multi-optode fNIRS array was placed  
212 over the contralateral perirolandic cortex and so the full extent of the nociceptive map is not  
213 known, but the data shows that the S1 somatotopic nociceptive map is not as precise as the  
214 touch map in the newborn.

### 215 ***Measuring the cortical haemodynamic response to innocuous and noxious*** 216 ***mechanical stimulation in neonates***

217 fNIRS is ideally suited to a study of this kind as recording and sensory stimulation, including  
218 clinically required heel lance, can be performed at the infant cotside (Bartocci et al., 2006;  
219 Slater et al., 2010; Kashou et al., 2016; Verriotis et al., 2016b). Other methods of measuring  
220 this either do not provide sufficient spatial information and source localisation, such as EEG  
221 recording of nociceptive-related ERPs (Fabrizi et al., 2011; Jones et al., 2018) or are limited  
222 by the use experimental 'pinprick' stimulators, that for ethical reasons are not actually  
223 painful, such as in fMRI studies (Goksan et al., 2015).

224 The change in the  $\Delta[\text{HbO}]$  and  $\Delta[\text{Hb}]$  following sensory stimulation is a measure of neural  
225 activity: simultaneous vertex EEG and fNIRS recordings over S1 show that haemodynamic  
226 and neural responses are related in magnitude (Verriotis et al., 2016b). Following all stimuli,  
227 and consistent with the mature canonical response, channels showing a significant increase  
228 in  $\Delta[\text{HbO}]$  also had a smaller decrease in  $\Delta[\text{Hb}]$ . Regional overperfusion following neuronal  
229 activation, beyond that required by metabolic demands, means that less Hb is removed from  
230 the region compared to the oversupply of HbO. However, the decrease in  $\Delta[\text{Hb}]$  was more  
231 widespread (but smaller in magnitude) compared to the localised increase in  $\Delta[\text{HbO}]$ . This  
232 type of response, not previously reported in infants (de Roever et al., 2018), suggests that  
233 more blood is leaving the region (removing Hb) compared to the incoming supply (no  
234 significant change in  $[\text{HbO}]$  in peripheral channels) due to immature regulation of cerebral  
235 blood flow (CBF). There are multiple mechanisms by which blood vessels dilate and CBF  
236 increases following neural activation, including arterial  $\text{CO}_2$  and  $\text{O}_2$  concentrations, which  
237 relax/contract the smooth muscle cells of cerebral arteries and arterioles (Kety and Schmidt,  
238 1948), and astrocyte and pericyte activity which contribute to vessel diameter and the  
239 propagation of vasodilation along the vascular tree (Takano et al., 2006; Cai et al., 2018),  
240 many of which are still developing in the newborn (Pryds and Greisen, 1989; Binmöller and  
241 Müller, 1992; Fujimoto, 1995) leading to rapid changes in CBF over the first postnatal days  
242 as cerebral circulation adapts (Meek et al., 1998).

243 These infants in this study were held skin to skin, swaddled in their mother's arms in a  
244 naturalistic setting, which is a major advantage of nIRS recording over fMRI for human  
245 developmental studies of brain function. Video recording and investigator scoring confirmed  
246 that while some infant movement and maternal touching did take place and that some

247 babies did move following the lance, these movements were varied in both body part and  
248 latency such that any associated cortical response would be removed during the averaging  
249 process. Furthermore, the chance of any larger movement from a few babies driving the  
250 widespread S1 response following the lance, is removed by the between group  
251 randomisation used to generate the null distribution of parameter differences. Finally, 33--  
252 50% of babies did grimace for up to 7 seconds following the lance, but if these facial  
253 movements mediated the response following the lance, this would have prolonged the peak  
254 or duration of the change in HbO, while in fact the latency and time course of the response  
255 to both stimuli was the same (see Figure 1).

### 256 ***Differential development of somatosensory and nociceptive topographic maps***

257 A whole-body topographical map of innocuous mechanical stimulation develops in the  
258 sensorimotor cortices over the early postnatal period in rats (Seelke et al., 2012), which  
259 represents the human final gestational trimester. In humans, distinct representations of the  
260 hands and feet can be observed from 31 weeks gestation, using fMRI (Dall'Orso et al.,  
261 2018), and from 28 weeks using neural activity recorded from the scalp (Donadio et al.,  
262 2018; Whitehead et al., 2018, 2019). The response to innocuous mechanical stimulation was  
263 more localised in S1 than the wider and less refined topographical map of noxious  
264 mechanical stimulation, suggesting a slower maturation of the S1 circuitry involved in  
265 nociceptive processing compared to touch processing in the infant brain.

266 In rodents, at every level of the developing somatosensory central nervous system, tactile  
267 processing matures before nociceptive processing (Fitzgerald, 2005; Koch and Fitzgerald,  
268 2013; Chang et al., 2016, 2020; Verriotis et al., 2016a) consistent with a delayed refinement  
269 of a cortical nociceptive map. Widespread nociceptive cortical maps are consistent with  
270 infant pain behaviour, characterised by exaggerated and disorganised nociceptive reflexes  
271 in both rodent pups and human neonates (Fitzgerald, 2005, 2015), and which can fail to  
272 remove a body part from the source of pain (Waldenström et al., 2003). Nociceptive  
273 reflexes following noxious heel lance are larger in magnitude and significantly more  
274 prolonged in human infants compared to adults (Cornelissen et al., 2013) and have  
275 widespread cutaneous receptive fields that encompass the whole lower limb (Andrews and  
276 Fitzgerald, 1994). This lack of organisation could be reflected in the ascending  
277 spinothalamic and thalamocortical projections, delaying the maturation of S1 cortical  
278 nociceptive maps in the newborn. Topographic maps are established and aligned via  
279 multiple mechanisms, including molecular cues, spontaneous or sensory-dependent  
280 remodelling, and refinement. Initially, somatosensory maps are diffuse and overlapping, but  
281 in the rodent somatosensory cortex, excitatory thalamocortical afferents undergo activity-  
282 dependent refinement to sharpen these maps (Iwasato et al., 1997). Equally important is  
283 the maturation of inhibitory interneuron sensory maps which, in contrast, expand over  
284 development in an experience dependent manner (Quast et al., 2017). Slow developmental  
285 broadening of an inhibitory nociceptive network may explain the widespread nociceptive  
286 map in S1 and also the greater amplitude of EEG noxious responses in infants compared to  
287 adults (Fabrizi et al., 2016).

### 288 ***Pain and the developing S1 cortex***

289 This study highlights the importance of understanding the development of touch and pain  
290 processing in the human infant brain. The widespread S1 nociceptive topography  
291 discovered here implies that the infant S1 cortex would be unable to accurately localise  
292 noxious events and may lack the computational ability to reliably send noxious information to  
293 higher brain centres (Thivierge and Marcus, 2007; Harding-Forrester and Feldman, 2018).  
294 Heel lance is one of many skin-breaking procedures commonly performed in neonatal  
295 hospital care (Laudiano-Dray et al., 2020) and this study reveals the extent of cortical  
296 activation that follows just one such noxious procedure in the newborn. This contrasts with  
297 innocuous mechanical stimulation, such as touch, which activates a spatially restricted and  
298 somatotopically defined cortical area. Increasing evidence that repeated noxious  
299 experiences have adverse effects upon the developing brain (Ranger and Grunau, 2014;

300 Duerden et al., 2018), underlines the importance of these results and the need for a better  
 301 understanding of the mechanisms underlying the maturation of cortical nociceptive  
 302 topographic maps.

303

## 304 **Materials and Methods**

### 305 **Participants**

306 Thirty-two infants (35-42 gestational weeks at birth, 0-7 days old, 12 female; **Table 1**) were  
 307 recruited from the postnatal, special care, and high dependency wards within the neonatal  
 308 unit at University College London Hospital. Infants received either 1) innocuous mechanical  
 309 stimulation (touch) of the heel, 2) innocuous mechanical stimulation of the hand, or 3) a  
 310 noxious mechanical stimulation (clinically required lance) of the heel. Six infants received  
 311 touch stimulation of both the heel and hand. Similar high impact works using single trial  
 312 noxious stimulation or multiple mechanical stimulations have yielded significant results with  
 313 group sample sizes of 5-15 (Bartocci et al., 2006) and 10-15 (Arichi et al., 2012),  
 314 respectively. Ethical approval for this study was given by the NHS Health Research Authority  
 315 (London – Surrey Borders) and the study conformed to the standards set by the Declaration  
 316 of Helsinki. Informed written parental consent was obtained before each study.  
 317

**Table 1. Infant demographics.** Demographic information about the subjects that received tactile and noxious stimuli of heel and hand.

|                                   | <b>Heel lance</b>                                       | <b>Heel touch</b>                         | <b>Hand touch</b>                                       | <b>p</b> |
|-----------------------------------|---------------------------------------------------------|-------------------------------------------|---------------------------------------------------------|----------|
| <b>N</b>                          | 11                                                      | 16                                        | 11                                                      |          |
| <b>GA (weeks<sup>+</sup>days)</b> | 39 <sup>+2</sup> (35 <sup>+2</sup> – 41 <sup>+5</sup> ) | 39 <sup>+4</sup> (35 – 42 <sup>+3</sup> ) | 39 <sup>+2</sup> (37 <sup>+5</sup> – 41 <sup>+3</sup> ) | .287     |
| <b>PNA (days)</b>                 | 4 (0 - 7)                                               | 3 (0 - 6)                                 | 3 (0 - 4)                                               | .115     |
| <b>Females</b>                    | 4 (36%)                                                 | 6 (38%)                                   | 5 (45%)                                                 | .889     |
| <b>Birth weight (g)</b>           | 3134 (2220 - 4072)                                      | 3250 (2360 - 4080)                        | 3300 (2450 - 3754)                                      | .774     |
| <b>Caesarean deliveries</b>       | 2 (18%)                                                 | 8 (50%)                                   | 3 (27%)                                                 | .196     |
| <b>Head circumference (cm)</b>    | 34 (32 – 35.5)                                          | 34.25 (31 - 37)                           | 34 (32.5 - 36)                                          | .900     |

*Values represent median and range or proportion. GA = gestational age (weeks from the first day of the mothers last menstrual cycle to birth); PNA = postnatal age (days since birth). No significant difference was found in any demographic parameter across the three groups (one-way ANOVA results in the last column).*

318

### 319 **Experimental design**

320 Brain activity (fNIRS) was recorded following a clinically-required heel lance procedure or  
 321 innocuous mechanical stimulation of the limbs at the bedside in the neonatal unit.

### 322 **Functional Near-Infrared Spectroscopy recording**

323 Infants wore a 21-channel array consisting of 8 sources and 8 detectors with inter-optode  
 324 distances of 2.5-4 cm. The array was secured over the pericentral area of the scalp on the  
 325 side contralateral to the stimulation with a custom designed textile cap (EasyCap). The  
 326 infants' head circumference, ear to ear lateral semi circumference, and nasion toinion  
 327 distance were measured and the cap was placed on the head by aligning specific 10/5  
 328 locations (Cz, T7). This optode arrangement provided sensitivity coverage for the whole  
 329 somatomotor cortex contralateral to the stimulation site and of the medial part on the  
 330 ipsilateral side (**Figure 4c**). One source-detector pair was placed at a more ventral posterior  
 331 location of the scalp (P7 of the international 10/5 positioning system) (**Figure 4a**). This  
 332 channel was sensitive to the posterior temporal lobe and worked as a control channel  
 333 (**Figure 4b and 4c**). A continuous wave recording system was used with 2 wavelengths of



334 source light at 780nm and 850nm and a sampling rate of 10Hz to measure changes in oxy-  
335 and deoxy-haemoglobin concentration (Gowerlabs NTS fNIRS system).  
336

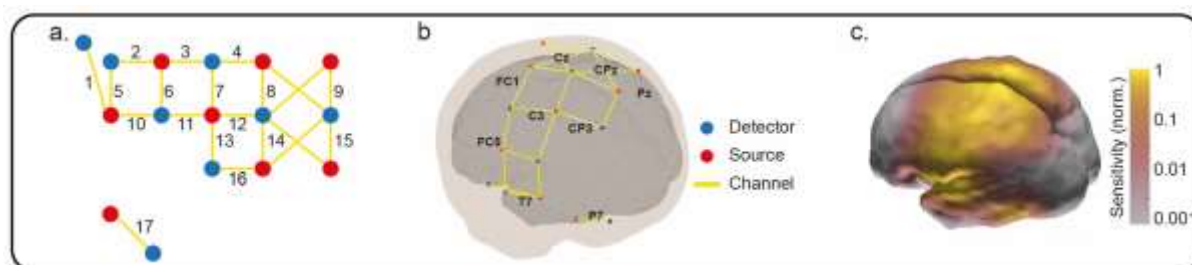

337  
338 **Figure 4. Optode locations and sensitivity map** (a) Channel reference numbers for Figure  
339 1 – source data 1. (b) Locations of the fNIRS sources, detectors and resulting measurement  
340 channels registered to a 39-week anatomical atlas. (c) Normalized fNIRS sensitivity  
341 illustrating the spatial coverage provided by the channel arrangement in panel (b). This  
342 sensitivity map was calculated using the photon measurement density functions derived  
343 from the TOAST++ light transport modelling package.  
344

#### 345 **Noxious mechanical stimulation**

346 The noxious stimulus was a clinically required heel lance for blood sampling. Blade release  
347 was time-locked to the NIRS recording using an accelerometer attached to the lancet  
348 (Worley et al., 2012). The lancet was placed against the heel for at least 30s prior to the  
349 release of the blade. This was to obtain a baseline period free from other stimulation. The  
350 heel was then squeezed 30s after the release of the blade, again to ensure a post-stimulus  
351 period free from other stimuli. All lances were performed by the same trained nurse (MPL-D)  
352 using a disposable lancet, and standard hospital practice was followed at all times.

#### 353 **Innocuous mechanical stimulation**

354 Innocuous mechanical stimulation was delivered by light touch on the lateral edge of the  
355 infants' palms and/or heels using a hand-held tendon hammer (ADInstruments). A piezo-  
356 electric sensor mounted on the hammer head provided a synchronising signal to the NIRS  
357 recording. A train of up to 15 touches (average = 11.5) was delivered to each limb with a  
358 variable inter-stimulus interval of 35 – 60 seconds. If the infant moved in the 30s pre- or  
359 post-stimulus the trial was removed (heel: average of 1.4 touches were removed in 8/16  
360 infants; hand: average of 1.5 touches removed in 11/11 infants). This resulted in an average  
361 of 10.1 heel touches (range = 7 – 13) and 9.3 hand touches (range = 5 – 11) per infant.

#### 362 **Recording infant movements**

363 All infants were prone against their mother's chest. The mother, who was inclined on a  
364 chair or bed, was instructed to avoid moving or stimulating the infant during the 1 minute  
365 before and after the release of the lance. Movements were minimized as infants were

366 swaddled (wrapped securely in clothes/blankets) against the mother's chest and the  
 367 research nurse was holding the exposed foot throughout the period before and after the  
 368 stimulus.

**Table 2. Infant movements.** The number of infants who displayed movements or received tactile stimulation from their mother each second in the 30s following lance.

| Post-lance (s) | Number of infant and maternal movements |      |      |      |     |   | Mother touching face | Mother touching head |
|----------------|-----------------------------------------|------|------|------|-----|---|----------------------|----------------------|
|                | Hand                                    | Head | Face | Foot | Arm |   |                      |                      |
| 1              | 1                                       | 1    | 4    | 0    | 2   | 1 | 1                    |                      |
| 2              | 1                                       | 1    | 6    | 1    | 2   | 1 | 1                    |                      |
| 3              | 1                                       | 0    | 6    | 1    | 2   | 1 | 1                    |                      |
| 4              | 1                                       | 0    | 6    | 0    | 2   | 1 | 1                    |                      |
| 5              | 1                                       | 1    | 6    | 0    | 2   | 1 | 1                    |                      |
| 6              | 1                                       | 1    | 6    | 0    | 2   | 1 | 0                    |                      |
| 7              | 0                                       | 1    | 4    | 0    | 1   | 1 | 0                    |                      |
| 8              | 0                                       | 1    | 3    | 0    | 1   | 1 | 0                    |                      |
| 9              | 0                                       | 1    | 2    | 0    | 1   | 1 | 0                    |                      |
| 10             | 0                                       | 0    | 1    | 0    | 1   | 1 | 0                    |                      |
| 11             | 0                                       | 0    | 1    | 0    | 1   | 1 | 0                    |                      |
| 12             | 0                                       | 0    | 1    | 0    | 1   | 1 | 0                    |                      |
| 13             | 0                                       | 0    | 1    | 0    | 1   | 1 | 0                    |                      |
| 14             | 0                                       | 0    | 1    | 0    | 1   | 1 | 0                    |                      |
| 15             | 0                                       | 0    | 1    | 0    | 0   | 1 | 0                    |                      |
| 16             | 0                                       | 0    | 1    | 0    | 0   | 1 | 0                    |                      |
| 17             | 0                                       | 0    | 0    | 0    | 0   | 1 | 0                    |                      |
| 18             | 0                                       | 0    | 0    | 0    | 0   | 1 | 0                    |                      |
| 19             | 0                                       | 0    | 0    | 0    | 0   | 1 | 0                    |                      |
| 20             | 0                                       | 0    | 0    | 0    | 0   | 1 | 0                    |                      |
| 21             | 0                                       | 0    | 0    | 0    | 0   | 1 | 0                    |                      |
| 22             | 0                                       | 0    | 0    | 0    | 0   | 1 | 0                    |                      |
| 23             | 0                                       | 0    | 0    | 0    | 0   | 1 | 0                    |                      |
| 24             | 0                                       | 0    | 0    | 0    | 0   | 1 | 0                    |                      |
| 25             | 0                                       | 0    | 0    | 0    | 0   | 1 | 0                    |                      |
| 26             | 0                                       | 0    | 0    | 0    | 0   | 1 | 0                    |                      |
| 27             | 0                                       | 0    | 0    | 0    | 0   | 1 | 0                    |                      |
| 28             | 0                                       | 0    | 0    | 0    | 0   | 1 | 0                    |                      |
| 29             | 0                                       | 0    | 0    | 0    | 0   | 1 | 0                    |                      |
| 30             | 0                                       | 0    | 0    | 0    | 0   | 1 | 0                    |                      |

*Each movement or stimulation was scored as present (1) or not present (0) per infant, and the value in each cell represents the total number of infants (out of 11) for whom each movement or stimulation was observed.*

369 Infant movements, or changing tactile stimulation were recorded on video, which was  
 370 synchronised with the NIRS recording using an LED light within the frame that was activated  
 371 by the release of the lance (Worley et al., 2012). In case movements were obscured, a  
 372 second researcher also recorded movements at the time of the study using a stopwatch.  
 373 Movements or tactile stimulation were separated into body parts and coded per second as  
 374 either 0 (not present) or 1 (present) for the 30 s post-stimulus. The total number of babies

375 displaying each type of movement at each second post-lance can be seen in Table 2.  
376 Following the lance, 2 babies did not move, 6 babies made small movements (including:  
377 small or brief grimace, head nod, twitch, small hand movement), 4 babies made larger  
378 movements (including arms, large or prolonged grimace, nod of head), and 2 babies  
379 received tactile stimulation from the mother (including: positioning the head, stroking the  
380 face).

### 381 **Data pre-processing**

382 All data were pre-processed in Homer2 (Huppert and Boas, 2005). Light intensity data were  
383 inspected for poor signal quality (signal intensity < 0.01, SNR < 2) resulting in 9 individual  
384 channels across lance trials (4%) being removed from further analysis, 12 across the heel  
385 touch trials (4%), and 6 across the hand touch trials (3%). Due to poor signal quality in the  
386 majority of trials, the 4 channels crossing over the midline were removed from all trials  
387 (**Figure 4a and 4b**). Data were then converted into optical density, motion artefacts were  
388 detected (change in amplitude > 0.7 and/or change in standard deviation > 15 over a 1s time  
389 period) and then corrected using Wavelet filtering (Molavi and Dumont, 2012). Instrumental  
390 drift and cardiac artefact were removed with a 0.01-0.5 Hz bandpass filter. Optical density  
391 changes recorded from all channels (likely related to stimulus dependent systemic  
392 physiological changes) were removed using Principal Component Analysis ((Kozberg and  
393 Hillman, 2016; Tachtsidis and Scholkmann, 2016); 1 component removed). Finally, data  
394 were converted into changes in oxy- and deoxy-haemoglobin concentration ( $\Delta[\text{HbO}]$  and  
395  $\Delta[\text{Hb}]$ ) using the modified Beer–Lambert law (Delpy et al., 1988) with a differential path-  
396 length factor of 4.39 (Wyatt et al., 1990). The continuous signal was then epoched from -5 to  
397 30 s around the noxious and somatosensory stimuli. Somatosensory stimuli were averaged  
398 for each subject.

### 399 **Signal to Noise**

400 The signal to noise ratio (SNR) for lance and for touch were calculated. Despite the peak  
401 signal for lance being higher, the SNR is lower, because more touch trials were averaged in  
402 this study. The ratio of lance to touch SNR  $((\text{peak}_{\text{lance}}/\text{peak}_{\text{touch}}) * (\text{sqrt}(n_{\text{lance}})/\text{sqrt}(n_{\text{touch}})) =$   
403  $(0.96/0.30) * (\text{sqrt}(11)/\text{sqrt}(157)) = 0.85$ .

### 404 **Channel-wise data analysis**

405 Pre-processed data were then averaged across subjects for each condition and analysed  
406 using custom MATLAB scripts (Mathworks; version 16b). For each channel, significant  
407 changes in  $\Delta[\text{HbO}]$  and  $\Delta[\text{Hb}]$  were identified with a two-tailed t-test ( $\alpha = 0.01$ ) comparing  
408 each time point post-stimulus against the baseline. This baseline distribution was calculated  
409 as the mean of the individual baselines (-5 – 0s before stimulus) according to:

$$\frac{1}{S} \sum_{i=1}^S x_i \sim N \left( \frac{1}{S} \sum_{i=1}^S \mu_i, \frac{1}{S^2} \sum_{i=1}^S \sigma_i^2 \right).$$

410 Where  $S$  is the number of subjects and  $x_i \sim N(\mu_i, \sigma_i^2)$  is the baseline for subject  $i$ .

411 Bonferroni correction was used for multiple comparisons (17 channels x 300 samples = 5100  
412 comparisons). Only changes (increases or decreases) which were continuously significant  
413 for at least 1 second (10% of the length of the post-lance period) were retained (Guthrie and  
414 Buchwald, 1991).

### 415 **Data analysis in image space**

#### 416 Image reconstruction

417 The channel-wise data was used to create functional images using a cortically constrained  
418 linear reconstruction approach. The fNIRS array was registered to a 39-week gestational  
419 age anatomical mesh model with 784391 nodes (Brigadoi et al., 2014) using tools from the  
420 AtlasViewer package (Aasted et al., 2015). Images were reconstructed using the DOT-HUB  
421 toolbox ([www.github.com/DOT-HUB](http://www.github.com/DOT-HUB)) and the TOAST++ light transport modelling package  
422 (Schweiger and Arridge, 2014) ([www.github.com/toastpp](http://www.github.com/toastpp)), with zeroth-order Tikhonov  
423 regularization with a regularization hyperparameter of 0.1.

#### 424 Assessment of changes in $\Delta[\text{HbO}]$ and $\Delta[\text{Hb}]$

425 We first assessed the significance of the changes in  $\Delta[\text{HbO}]$  and  $\Delta[\text{Hb}]$  elicited by heel and  
426 hand touch and heel lance compared to baseline in image space. To do that, we  
427 reconstructed image time-series (i.e. one image reconstructed at each time-point) for each  
428 subject/stimulus. For each node, significant peak reconstructed changes in  $\Delta[\text{HbO}]$  and  
429  $\Delta[\text{Hb}]$  were identified with a two-tailed t-test ( $\alpha = 0.01$ ) comparing the peak time point within  
430 a 5-second window around the peak latency derived from the channel-wise analysis against  
431 the baseline. As in channel-wise analysis this baseline distribution was calculated as the  
432 mean of the individual baselines (-5 – 0s pre-stimulus). Bonferroni correction was used for  
433 multiple comparisons (784391 nodes = 784391 comparisons). To display these results we:  
434 (1) reconstructed an image using the average channel-wise data within the 5-second  
435 window around the peak latency (averaged in time) for hand touch, heel touch and lance  
436 and (2) masked this image according to the result of the statistical test above.

#### 437 Comparison of changes in $\Delta[\text{HbO}]$ and $\Delta[\text{Hb}]$ between heel lance and touch

438 Next, we wanted to compare the peak changes in  $\Delta[\text{HbO}]$  and  $\Delta[\text{Hb}]$  between the heel lance  
439 and touch conditions in image space. To do this, we calculated the difference in overall area  
440 of activation, and magnitude, latency, location, and spread of the peak change in  $\Delta[\text{HbO}]$   
441 and  $\Delta[\text{Hb}]$ , and compared these against a non-parametric null distribution.

442 Area of activation was defined as the cortical surface area with significant  $\Delta[\text{HbO}]$  (or  $\Delta[\text{Hb}]$ )  
443 changes. Difference in peak location was the Euclidean distance between the peaks. Peak  
444 spread was defined as the cortical surface area around the peak where changes in  $\Delta[\text{HbO}]$   
445 (or  $\Delta[\text{Hb}]$ ) were at least half of the peak change (full-width half-maximum, FWHM). Cortical  
446 surface areas (area of activation and peak spread) were defined by starting at the node with  
447 the peak change and continually expanding to include neighbouring nodes that were (1)  
448 connected by at least 2/3 face edges, and (2) had a significant change from baseline.

449 The non-parametric null distribution was derived by calculating these differences between  
450 randomly selected sets of surrogate image time-series (bootstrapping on surrogate data).  
451 We here describe how we obtained surrogate image time-series and then how we  
452 conducted bootstrapping.

453 Each individual recording (i.e image time-series) can be considered as the linear sum of a  
454 signal of interest (i.e. the response to the stimulus) and a stationary random noise  
455 component. The assumption is that the signal is the same in each recording while the noise  
456 changes. Therefore, if we were to conduct another recording on another subject the new  
457 data would be the linear sum of the *same* signal that we find in the original data but *different*  
458 random noise. Creating surrogate data consists in generating new random noise to add to  
459 the signal estimated from our data. To do this we: (1) estimate the signal by averaging  
460 across individual recordings (i.e. subjects) in response to the same stimulus modality; (2)  
461 isolate the noise in our data by subtracting this estimate from each recording; (3) *phase-*  
462 *randomise* each noise time-series. Phase-randomization is applied independently to each  
463 node time-series in the frequency-domain. This means that the phase component of the  
464 complex-valued signal is rotated at each frequency by an independent random variable  
465 chosen from the uniformly distributed range of 0 and  $2\pi$  (Theiler et al., 1992). At the end of  
466 this process we have a new set of surrogate noise time-series.

467 To generate the full non-parametric null distribution against which to compare our data, we  
468 used bootstrapping. To estimate each sample of the null distribution, we calculated the  
469 differences in area of activation and peak amplitude, latency, position and FWHM between  
470 two random sets of surrogate data without any systematic difference. To create the random  
471 sets, we: (1) pooled together all the newly obtained surrogate noise time-series; (2) added  
472 the grand average (across lance and touch) signal (as we do not want systematic  
473 differences between sets to estimate a null distribution); (3) randomly split (with repetition)  
474 these surrogate data into two sets. We repeated this 1000 times in order to obtain the full  
475 non-parametric null distribution (bootstrapping). An experimental difference outside the 95%  
476 confidence interval was considered significant ( $p < 0.05$ ).

477 **Data sharing**

478 All raw data files are open access and are available to download from Figshare  
479 (<https://doi.org/10.6084/m9.figshare.13252388.v2>).

480

481 **References**

- 482 Aasted CM, Yücel MA, Cooper RJ, Dubb J, Tsuzuki D, Becerra L, Petkov MP, Borsook D,  
483 Dan I, Boas DA (2015) Anatomical guidance for functional near-infrared  
484 spectroscopy: AtlasViewer tutorial. *Neurophotonics* 2:020801.
- 485 Akselrod M, Martuzzi R, Serino A, van der Zwaag W, Gassert R, Blanke O (2017)  
486 Anatomical and functional properties of the foot and leg representation in areas 3b, 1  
487 and 2 of primary somatosensory cortex in humans: A 7T fMRI study. *NeuroImage*  
488 159:473–487.
- 489 Allievi AG, Arichi T, Tusor N, Kimpton J, Arulkumaran S, Counsell SJ, Edwards AD, Burdet  
490 E (2016) Maturation of Sensori-Motor Functional Responses in the Preterm Brain.  
491 *Cereb Cortex* 26:402–413.
- 492 Andersson JL, Lilja A, Hartvig P, Långström B, Gordh T, Handwerker H, Torebjörk E (1997)  
493 Somatotopic organization along the central sulcus, for pain localization in humans, as  
494 revealed by positron emission tomography. *Exp Brain Res* 117:192–199.
- 495 Andrews K, Fitzgerald M (1994) The cutaneous withdrawal reflex in human neonates:  
496 sensitization, receptive fields, and the effects of contralateral stimulation. *Pain* 56:95–  
497 101.
- 498 Arichi T, Fagiolo G, Varela M, Melendez-Calderon A, Allievi A, Merchant N, Tusor N,  
499 Counsell SJ, Burdet E, Beckmann CF, Edwards AD (2012) Development of BOLD  
500 signal hemodynamic responses in the human brain. *NeuroImage* 63:663–673.
- 501 Bartocci M, Bergqvist LL, Lagercrantz H, Anand KJS (2006) Pain activates cortical areas in  
502 the preterm newborn brain. *Pain* 122:109–117.
- 503 Beggs S, Torsney C, Drew LJ, Fitzgerald M (2002) The postnatal reorganization of primary  
504 afferent input and dorsal horn cell receptive fields in the rat spinal cord is an activity-  
505 dependent process. *Eur J Neurosci* 16:1249–1258.
- 506 Bembich S, Brovedani P, Cont G, Travan L, Grassi V, Demarini S (2015) Pain activates a  
507 defined area of the somatosensory and motor cortex in newborn infants. *Acta*  
508 *Paediatr Oslo Nor* 1992 104:e530-533.
- 509 Bembich S, Marrazzo F, Barini A, Ravalico P, Cont G, Demarini S (2016) The cortical  
510 response to a noxious procedure changes over time in preterm infants. *Pain*  
511 157:1979–1987.
- 512 Binmöller F-J, Müller CM (1992) Postnatal development of dye-coupling among astrocytes in  
513 rat visual cortex. *Glia* 6:127–137.
- 514 Blake DT, Byl NN, Merzenich MM (2002) Representation of the hand in the cerebral cortex.  
515 *Behav Brain Res* 135:179–184.
- 516 Brigadoi S, Aljabar P, Kuklisova-Murgasova M, Arridge SR, Cooper RJ (2014) A 4D  
517 neonatal head model for diffuse optical imaging of pre-term to term infants.  
518 *NeuroImage* 100:385–394.
- 519 Cai C, Fordsmann JC, Jensen SH, Gesslein B, Lønstrup M, Hald BO, Zambach SA, Brodin  
520 B, Lauritzen MJ (2018) Stimulation-induced increases in cerebral blood flow and  
521 local capillary vasoconstriction depend on conducted vascular responses. *Proc Natl*  
522 *Acad Sci* 115:E5796–E5804.
- 523 Chang P, Fabrizi L, Fitzgerald M (2020) Distinct Age-Dependent C Fiber-Driven Oscillatory  
524 Activity in the Rat Somatosensory Cortex. *eNeuro* 7.
- 525 Chang P, Fabrizi L, Olhede S, Fitzgerald M (2016) The Development of Nociceptive Network  
526 Activity in the Somatosensory Cortex of Freely Moving Rat Pups. *Cereb Cortex N Y*  
527 *N* 1991 26:4513–4523.
- 528 Chen LM, Dillenburg BC, Wang F, Friedman RM, Avison MJ (2011) High-resolution  
529 functional magnetic resonance imaging mapping of noxious heat and tactile  
530 activations along the central sulcus in New World monkeys. *Pain* 152:522–532.

- 531 Cornelissen L, Fabrizi L, Patten D, Worley A, Meek J, Boyd S, Slater R, Fitzgerald M (2013)  
532 Postnatal Temporal, Spatial and Modality Tuning of Nociceptive Cutaneous Flexion  
533 Reflexes in Human Infants. PLoS ONE 8 Available at:  
534 <https://www.ncbi.nlm.nih.gov/pmc/articles/PMC3790695/> [Accessed January 21,  
535 2019].
- 536 Dall'Orso S, Steinweg J, Allievi AG, Edwards AD, Burdet E, Arichi T (2018) Somatotopic  
537 Mapping of the Developing Sensorimotor Cortex in the Preterm Human Brain. Cereb  
538 Cortex 28:2507–2515.
- 539 de Roeve I, Bale G, Mitra S, Meek J, Robertson NJ, Tachtsidis I (2018) Investigation of the  
540 Pattern of the Hemodynamic Response as Measured by Functional Near-Infrared  
541 Spectroscopy (fNIRS) Studies in Newborns, Less Than a Month Old: A Systematic  
542 Review. Front Hum Neurosci 12 Available at:  
543 <https://www.ncbi.nlm.nih.gov/pmc/articles/PMC6176492/> [Accessed March 2, 2020].
- 544 Delpy DT, Cope M, Zee P van der, Arridge S, Wray S, Wyatt J (1988) Estimation of optical  
545 pathlength through tissue from direct time of flight measurement. Phys Med Biol  
546 33:1433–1442.
- 547 Donadio A, Whitehead K, Gonzalez F, Wilhelm E, Formica D, Meek J, Fabrizi L, Burdet E  
548 (2018) A novel sensor design for accurate measurement of facial somatosensation in  
549 pre-term infants. PLOS ONE 13:e0207145.
- 550 Duerden EG, Grunau RE, Guo T, Foong J, Pearson A, Au-Young S, Lavoie R, Chakravarty  
551 MM, Chau V, Synnes A, Miller SP (2018) Early Procedural Pain Is Associated with  
552 Regionally-Specific Alterations in Thalamic Development in Preterm Neonates. J  
553 Neurosci Off J Soc Neurosci 38:878–886.
- 554 Fabrizi L, Slater R, Worley A, Meek J, Boyd S, Olhede S, Fitzgerald M (2011) A shift in  
555 sensory processing that enables the developing human brain to discriminate touch  
556 from pain. Curr Biol 21:1552–1558.
- 557 Fabrizi L, Verriotis M, Williams G, Lee A, Meek J, Olhede S, Fitzgerald M (2016) Encoding of  
558 mechanical nociception differs in the adult and infant brain. Sci Rep 6:28642.
- 559 Fitzgerald M (2005) The development of nociceptive circuits. Nat Rev Neurosci 6:507–520.
- 560 Fitzgerald M (2015) What do we really know about newborn infant pain? Exp Physiol  
561 100:1451–1457.
- 562 Fujimoto K (1995) Pericyte-endothelial gap junctions in developing rat cerebral capillaries: A  
563 fine structural study. Anat Rec 242:562–565.
- 564 Goksan S, Hartley C, Emery F, Cockrill N, Poorun R, Moultrie F, Rogers R, Campbell J,  
565 Sanders M, Adams E, Clare S, Jenkinson M, Tracey I, Slater R (2015) fMRI reveals  
566 neural activity overlap between adult and infant pain. eLife 4:e06356.
- 567 Guthrie D, Buchwald JS (1991) Significance Testing of Difference Potentials.  
568 Psychophysiology 28:240–244.
- 569 Harding-Forrester S, Feldman DE (2018) Somatosensory maps. Handb Clin Neurol 151:73–  
570 102.
- 571 Huppert T, Boas DA (2005) HomER: Hemodynamic evoked response NIRS data analysis  
572 GUI. Available from the Photon Migration Imaging Lab. Martinos Cent Biomed  
573 Imaging Available at: <http://www.nmr.mgh.harvard.edu/PMI>.
- 574 Iwasato T, Erzurumlu RS, Huerta PT, Chen DF, Sasaoka T, Ulupinar E, Tonegawa S (1997)  
575 NMDA Receptor-Dependent Refinement of Somatotopic Maps. Neuron 19:1201–  
576 1210.
- 577 Jones L, Laudiano-Dray MP, Whitehead K, Verriotis M, Meek J, Fitzgerald M, Fabrizi L  
578 (2018) EEG, behavioural and physiological recordings following a painful procedure  
579 in human neonates. Sci Data 5:180248.
- 580 Kashou NH, Dar IA, Hasenstab KA, Nahhas RW, Jadcherla SR (2016) Somatic stimulation  
581 causes frontoparietal cortical changes in neonates: a functional near-infrared  
582 spectroscopy study. Neurophotonics 4:011004.
- 583 Kenshalo DR, Iwata K, Sholas M, Thomas DA (2000) Response properties and organization  
584 of nociceptive neurons in area 1 of monkey primary somatosensory cortex. J  
585 Neurophysiol 84:719–729.

- 586 Kety SS, Schmidt CF (1948) The effects of altered arterial tensions of carbon dioxide and  
587 oxygen on cerebral blood flow and cerebral oxygen consumption of normal young  
588 men. *J Clin Invest* 27:484–492.
- 589 Koch SC, Fitzgerald M (2013) Activity-dependent development of tactile and nociceptive  
590 spinal cord circuits. *Ann N Y Acad Sci* 1279:97–102.
- 591 Kozberg M, Hillman E (2016) Chapter 10 - Neurovascular coupling and energy metabolism  
592 in the developing brain. In: *Progress in Brain Research* (Masamoto K, Hirase H,  
593 Yamada K, eds), pp 213–242 *New Horizons in Neurovascular Coupling: A Bridge*  
594 *Between Brain Circulation and Neural Plasticity*. Elsevier. Available at:  
595 <http://www.sciencedirect.com/science/article/pii/S0079612316000376> [Accessed  
596 September 24, 2019].
- 597 Laudiano-Dray MP, Pillai Riddell R, Jones L, Iyer R, Whitehead K, Fitzgerald M, Fabrizi L,  
598 Meek J (2020) Quantification of neonatal procedural pain severity: a platform for  
599 estimating total pain burden in individual infants. *Pain* 161:1270–1277.
- 600 Lui F, Duzzi D, Corradini M, Serafini M, Baraldi P, Porro CA (2008) Touch or pain? Spatio-  
601 temporal patterns of cortical fMRI activity following brief mechanical stimuli: *Pain*  
602 138:362–374.
- 603 Mancini F, Haggard P, Iannetti GD, Longo MR, Sereno MI (2012) Fine-grained nociceptive  
604 maps in primary somatosensory cortex. *J Neurosci Off J Soc Neurosci* 32:17155–  
605 17162.
- 606 Meek JH, Tyszczyk L, Elwell CE, Wyatt JS (1998) Cerebral blood flow increases over the  
607 first three days of life in extremely preterm neonates. *Arch Dis Child - Fetal Neonatal*  
608 *Ed* 78:F33–F37.
- 609 Molavi B, Dumont GA (2012) Wavelet-based motion artifact removal for functional near-  
610 infrared spectroscopy. *Physiol Meas* 33:259–270.
- 611 Penfield W, Boldrey E (1937) SOMATIC MOTOR AND SENSORY REPRESENTATION IN  
612 THE CEREBRAL CORTEX OF MAN AS STUDIED BY ELECTRICAL  
613 STIMULATION. *Brain* 60:389–443.
- 614 Pryds O, Greisen G (1989) Effect of PaCO<sub>2</sub> and Haemoglobin Concentration on Day to Day  
615 Variation of CBF in Preterm Neonates. *Acta Paediatr* 78:33–36.
- 616 Quast KB, Ung K, Froudarakis E, Huang L, Herman I, Addison AP, Ortiz-Guzman J,  
617 Cordiner K, Saggau P, Tolia AS, Arenkiel BR (2017) Developmental broadening of  
618 inhibitory sensory maps. *Nat Neurosci* 20:189–199.
- 619 Ranger M, Grunau RE (2014) Early repetitive pain in preterm infants in relation to the  
620 developing brain. *Pain Manag* 4:57–67.
- 621 Schouenborg J (2008) Action-based sensory encoding in spinal sensorimotor circuits. *Brain*  
622 *Res Rev* 57:111–117.
- 623 Schweiger M, Arridge SR (2014) The Toast++ software suite for forward and inverse  
624 modeling in optical tomography. *J Biomed Opt* 19:040801.
- 625 Seelke AMH, Dooley JC, Krubitzer LA (2012) The Emergence of Somatotopic Maps of the  
626 Body in S1 in Rats: The Correspondence Between Functional and Anatomical  
627 Organization. *PLOS ONE* 7:e32322.
- 628 Slater R, Cantarella A, Gallella S, Worley A, Boyd S, Meek J, Fitzgerald M (2006) Cortical  
629 Pain Responses in Human Infants. *J Neurosci* 26:3662–3666.
- 630 Slater R, Worley A, Fabrizi L, Roberts S, Meek J, Boyd S, Fitzgerald M (2010) Evoked  
631 potentials generated by noxious stimulation in the human infant brain. *Eur J Pain*  
632 *Lond Engl* 14:321–326.
- 633 Tachtsidis I, Scholkmann F (2016) False positives and false negatives in functional near-  
634 infrared spectroscopy: issues, challenges, and the way forward. *Neurophotonics*  
635 3:031405.
- 636 Takano T, Tian G-F, Peng W, Lou N, Libionka W, Han X, Nedergaard M (2006) Astrocyte-  
637 mediated control of cerebral blood flow. *Nat Neurosci* 9:260–267.
- 638 Theiler J, Eubank S, Longtin A, Galdrikian B, Doyne Farmer J (1992) Testing for nonlinearity  
639 in time series: the method of surrogate data. *Phys Nonlinear Phenom* 58:77–94.

- 640 Thivierge J-P, Marcus GF (2007) The topographic brain: from neural connectivity to  
 641 cognition. *Trends Neurosci* 30:251–259.
- 642 Treede RD, Kenshalo DR, Gracely RH, Jones AK (1999) The cortical representation of pain.  
 643 *Pain* 79:105–111.
- 644 Verriotis M, Chang P, Fitzgerald M, Fabrizi L (2016a) The development of the nociceptive  
 645 brain. *Neuroscience* 338:207–219.
- 646 Verriotis M, Fabrizi L, Lee A, Cooper RJ, Fitzgerald M, Meek J (2016b) Mapping Cortical  
 647 Responses to Somatosensory Stimuli in Human Infants with Simultaneous Near-  
 648 Infrared Spectroscopy and Event-Related Potential Recording. *eNeuro*  
 649 3:ENEURO.0026-16.2016.
- 650 Waldenström A, Thelin J, Thimansson E, Levinsson A, Schouenborg J (2003)  
 651 Developmental learning in a pain-related system: evidence for a cross-modality  
 652 mechanism. *J Neurosci Off J Soc Neurosci* 23:7719–7725.
- 653 Whitehead K, Laudiano-Dray P, Pressler RM, Meek J, Fabrizi L (2018) T152.  
 654 Somatosensory evoked delta brush activity in very pre-term infants. *Clin*  
 655 *Neurophysiol* 129:e60–e61.
- 656 Whitehead K, Papadelis C, Laudiano-Dray MP, Meek J, Fabrizi L (2019) The emergence of  
 657 hierarchical somatosensory processing in late prematurity. *Cereb Cortex* 29:2245–  
 658 2260.
- 659 Willoughby WR, Thoenes K, Bolding M (2020) Somatotopic Arrangement of the Human  
 660 Primary Somatosensory Cortex Derived From Functional Magnetic Resonance  
 661 Imaging. *Front Neurosci* 14:598482.
- 662 Worley A, Fabrizi L, Boyd S, Slater R (2012) Multi-modal pain measurements in infants. *J*  
 663 *Neurosci Methods* 205:252–257.
- 664 Wyatt JS, Cope M, Delpy DT, Zee P van der, Arridge S, Edwards AD, Reynolds EOR (1990)  
 665 Measurement of Optical Path Length for Cerebral Near-Infrared Spectroscopy in  
 666 Newborn Infants. *Dev Neurosci* 12:140–144.

667  
 668  
 669  
 670  
 671  
 672

### 673 **Supplements and Source Data**

674 **Figure 1 – Source Data 1. Significant concentration changes at each channel**  
 675 **following innocuous mechanical stimulation (touch) of the heel and the hand and**  
 676 **following heel lance** *Minimum and maximum  $\Delta[HbO]$  and  $\Delta[Hb]$  at every channel and the*  
 677 *corresponding latency. The range of Bonferroni-corrected p values across all significant*  
 678 *timepoints is provided.  $\downarrow$  = significant decrease only,  $\uparrow$  significant increase only,  $\uparrow/\downarrow$  = both a*  
 679 *significant increase and decrease were observed at different latencies. The location of each*  
 680 *channel is shown in Figure 4.*

| Stimulus | Channel | Max<br>$\Delta[HbO]$<br>$\mu M$ | Min<br>$\Delta[HbO]$<br>$\mu M$ | Direction<br>of sig. $\Delta$ | p value      | Max<br>$\Delta[Hb]$<br>$\mu M$ | Min<br>$\Delta[Hb]$<br>$\mu M$ | Direction<br>of sig. $\Delta$ | p value      |
|----------|---------|---------------------------------|---------------------------------|-------------------------------|--------------|--------------------------------|--------------------------------|-------------------------------|--------------|
| Lance    | 1       | 0.14<br>(6.8s)                  | -0.79<br>(15.9s)                | $\downarrow$                  | <.001 - .012 | 0.05<br>(0.1s)                 | -0.38<br>(7.1s)                |                               | ns           |
|          | 2       | -0.01<br>(8.2s)                 | -0.97<br>(22.7s)                | $\downarrow$                  | <.001 - .010 | 0.27<br>(22.9s)                | -0.42<br>(8.2s)                | $\downarrow$                  | <.001 - .026 |
|          | 3       | 0.03<br>(1.9s)                  | -0.61<br>(20.5s)                | $\downarrow$                  | <.001 - .014 | 0.03<br>(23.1s)                | -1.03<br>(9.1s)                | $\downarrow$                  | <.001 - .012 |
|          | 4       | 0.10<br>(8.9s)                  | -0.86<br>(23s)                  | $\downarrow$                  | <.001 - .012 | 0.09<br>(22.6s)                | -0.67<br>(8.3s)                | $\downarrow$                  | <.001 - .011 |



|                   |       |                  |                  |   |              |                 |                  |     |              |  |
|-------------------|-------|------------------|------------------|---|--------------|-----------------|------------------|-----|--------------|--|
|                   | 5     | 0.24<br>(5s)     | -0.67<br>(19.9s) | ↓ | <.001 - .016 | 0.62<br>(3.1s)  | -0.12<br>(28.2s) | ↑   | <.001 - .007 |  |
|                   | 6     | 0.60<br>(12s)    | -0.05<br>(2.1s)  | ↑ | <.001 - .011 | 0.03<br>(18s)   | -0.41<br>(7.3s)  | ↓   | <.001 - .014 |  |
|                   | 7     | 0.53<br>(5.6s)   | -0.20<br>(25.6s) | ↑ | <.001 - .018 | 0.00<br>(0.1s)  | -0.99<br>(8.2s)  | ↓   | <.001 - .016 |  |
|                   | 8     | -0.18<br>(15.2s) | -0.62<br>(22.2s) | ↓ | <.001 - .012 | 0.39<br>(27.9s) | -0.47<br>(10.9s) | ↑/↓ | <.001 - .021 |  |
|                   | 9     | 0.31<br>(12.8s)  | -0.58<br>(30s)   | ↓ | <.001 - .013 | 0.68<br>(4.4s)  | -0.13<br>(18.5s) | ↑   | <.001 - .013 |  |
|                   | 10    | 0.31<br>(7.2s)   | -0.36<br>(16.4s) |   | ns           | 0.62<br>(2.9s)  | -0.02<br>(26.3s) | ↑   | <.001 - .033 |  |
|                   | 11    | 0.94<br>(14.4s)  | -0.11<br>(2.7s)  | ↑ | <.001 - .018 | 0.13<br>(22.9s) | -0.35<br>(11s)   | ↓   | <.001 - .021 |  |
|                   | 12    | 0.62<br>(8.2s)   | -0.25<br>(29.6s) | ↑ | <.001 - .018 | 0.04<br>(17.8s) | -0.61<br>(11.3s) | ↓   | <.001 - .011 |  |
|                   | 13    | 0.96<br>(14.5s)  | -0.45<br>(28s)   | ↑ | <.001 - .012 | 0.01<br>(30s)   | -0.56<br>(9.7s)  | ↓   | <.001 - .057 |  |
|                   | 14    | 0.71<br>(15.7s)  | 0.02<br>(2.6s)   | ↑ | <.001 - .016 | 0.00<br>(30s)   | -0.39<br>(13s)   | ↓   | <.001 - .022 |  |
|                   | 15    | 0.46<br>(17s)    | 0.10<br>(0.1s)   |   | ns           | 0.72<br>(20.7s) | 0.12<br>(0.9s)   | ↑   | <.001 - .010 |  |
|                   | 16    | 0.91<br>(14.1s)  | -0.39<br>(29.3s) | ↑ | <.001 - .010 | 0.44<br>(5s)    | -0.12<br>(12.2s) | ↑   | <.001 - .012 |  |
|                   | 17    | 0.52<br>(12.1s)  | -0.19<br>(24.3s) | ↑ | <.001 - .011 | 0.28<br>(23.6s) | -0.12<br>(14.2s) | ↑   | <.001 - .025 |  |
|                   | <hr/> |                  |                  |   |              |                 |                  |     |              |  |
|                   | 1     | 0.04<br>(6.9s)   | -0.25<br>(30s)   | ↓ | <.001 - .018 | 0.09<br>(19.1s) | -0.08<br>(9.5s)  | ↑/↓ | <.001 - .022 |  |
|                   | 2     | 0.09<br>(20.2s)  | -0.09<br>(30s)   |   | ns           | 0.09<br>(30s)   | -0.03<br>(8.3s)  | ↑   | <.001 - .014 |  |
|                   | 3     | 0.07<br>(2.7s)   | -0.12<br>(25.2s) |   | ns           | 0.07<br>(4s)    | -0.2<br>(11.2s)  | ↓   | <.001 - .014 |  |
|                   | 4     | 0.00<br>(12.6s)  | -0.11<br>(24.1s) | ↓ | <.001 - .013 | 0.03<br>(30s)   | -0.13<br>(11.2s) | ↓   | <.001 - .012 |  |
|                   | 5     | 0.07<br>(11s)    | -0.06<br>(30s)   |   | ns           | 0.03<br>(30s)   | -0.04<br>(13.1s) |     | ns           |  |
|                   | 6     | 0.09<br>(9.1s)   | -0.05<br>(28.2s) |   | ns           | 0.03<br>(3.1s)  | -0.1<br>(11.2s)  | ↓   | <.001 - .030 |  |
|                   | 7     | 0.03<br>(0.9s)   | -0.11<br>(18.5s) |   | ns           | 0.01<br>(5s)    | -0.13<br>(11.4s) | ↓   | <.001 - .016 |  |
|                   | 8     | 0.19<br>(14.5s)  | -0.05<br>(24.2s) | ↑ | <.001 - .010 | 0.05<br>(4s)    | -0.1<br>(10s)    |     | ns           |  |
|                   | 9     | 0.21<br>(9.3s)   | -0.04<br>(26.1s) | ↑ | <.001 - .011 | 0.09<br>(24.5s) | -0.11<br>(12.4s) |     | ns           |  |
|                   | 10    | 0.04<br>(10.4s)  | -0.10<br>(28.7s) |   | ns           | 0.09<br>(28s)   | -0.06<br>(12.8s) | ↑   | <.001 - .013 |  |
|                   | 11    | 0.03<br>(17.4s)  | -0.07<br>(24.7s) |   | ns           | 0.11<br>(24.6s) | -0.07<br>(11.3s) | ↑   | <.001 - .018 |  |
|                   | 12    | 0.16<br>(14.4s)  | 0.02<br>(5.2s)   | ↑ | <.001 - .026 | 0.05<br>(5.4s)  | -0.08<br>(30s)   | ↑/↓ | <.001 - .016 |  |
|                   | 13    | 0.09<br>(13.4s)  | -0.06<br>(5.6s)  |   | ns           | 0.07<br>(4.5s)  | -0.1<br>(15.8s)  | ↑/↓ | <.001 - .013 |  |
| <b>Foot touch</b> |       |                  |                  |   |              |                 |                  |     |              |  |

|                   |    |                 |                  |   |              |                 |                  |     |              |
|-------------------|----|-----------------|------------------|---|--------------|-----------------|------------------|-----|--------------|
|                   | 14 | 0.27<br>(14.7s) | 0.00<br>(30s)    | ↑ | <.001 - .018 | 0.10<br>(4.2s)  | -0.1<br>(27.4s)  | ↑/↓ | <.001 - .055 |
|                   | 15 | 0.07<br>(11.8s) | -0.09<br>(26.8s) |   | ns           | 0.02<br>(4.6s)  | -0.16<br>(11.4s) | ↓   | <.001 - .011 |
|                   | 16 | 0.30<br>(15.8s) | 0.03<br>(0.1s)   | ↑ | <.001 - .029 | 0.10<br>(15.8s) | -0.05<br>(29.6s) | ↑   | <.001 - .014 |
|                   | 17 | 0.13<br>(17s)   | -0.13<br>(30s)   | ↑ | <.001 - .012 | 0.08<br>(19.7s) | -0.09<br>(9.4s)  | ↑/↓ | <.001 - .049 |
|                   | 1  | 0.25<br>(11.3s) | -0.05<br>(23.5s) | ↑ | <.001 - .022 | 0.02<br>(29.9s) | -0.09<br>(3.4s)  |     | ns           |
|                   | 2  | 0.28<br>(17.3s) | 0.02<br>(1.4s)   | ↑ | <.001 - .011 | 0.03<br>(30s)   | -0.14<br>(9s)    | ↓   | <.001 - .017 |
|                   | 3  | 0.31<br>(16.9s) | -0.10<br>(1.1s)  | ↑ | <.001 - .035 | 0.04<br>(1.2s)  | -0.16<br>(17s)   |     | ns           |
|                   | 4  | 0.21<br>(19.1s) | -0.05<br>(6.4s)  | ↑ | <.001 - .015 | 0.02<br>(7.2s)  | -0.21<br>(17.7s) | ↓   | <.001 - .013 |
|                   | 5  | 0.12<br>(8s)    | -0.07<br>(14.7s) |   | ns           | 0.05<br>(23.1s) | -0.05<br>(28.3s) |     | ns           |
|                   | 6  | 0.19<br>(21.5s) | -0.07<br>(1.4s)  | ↑ | <.001 - .015 | 0.03<br>(30s)   | -0.14<br>(13.1s) | ↓   | <.001 - .012 |
|                   | 7  | 0.07<br>(1s)    | -0.12<br>(23s)   |   | ns           | 0.12<br>(29.5s) | -0.07<br>(0.9s)  |     | ns           |
|                   | 8  | 0.17<br>(11.4s) | -0.05<br>(24.1s) |   | ns           | 0.03<br>(24s)   | -0.17<br>(17.6s) | ↓   | <.001 - .019 |
| <b>Hand touch</b> | 9  | 0.05<br>(0.2s)  | -0.21<br>(28.9s) | ↓ | <.001 - .013 | 0.13<br>(24s)   | -0.09<br>(2.6s)  |     | ns           |
|                   | 10 | 0.06<br>(15.8s) | -0.15<br>(7.7s)  |   | ns           | 0.04<br>(20.3s) | -0.07<br>(15s)   |     | ns           |
|                   | 11 | 0.08<br>(5.2s)  | -0.25<br>(20.5s) | ↓ | <.001 - .013 | 0.09<br>(22.9s) | -0.15<br>(9.6s)  | ↓   | <.001 - .011 |
|                   | 12 | 0.09<br>(3.1s)  | -0.15<br>(23.8s) | ↓ | <.001 - .011 | 0.11<br>(30s)   | -0.09<br>(8.7s)  | ↑   | <.001 - .011 |
|                   | 13 | 0.09<br>(3s)    | -0.27<br>(20.3s) | ↓ | <.001 - .012 | 0.05<br>(28s)   | -0.12<br>(9s)    | ↑/↓ | <.001 - .013 |
|                   | 14 | 0.10<br>(3.2s)  | -0.14<br>(23.3s) |   | ns           | 0.01<br>(22.7s) | -0.12<br>(6.2s)  | ↓   | <.001 - .010 |
|                   | 15 | 0.11<br>(2.4s)  | -0.15<br>(16.7s) | ↓ | <.001 - .010 | 0.13<br>(24.7s) | -0.01<br>(1.3s)  | ↑   | <.001 - .038 |
|                   | 16 | 0.07<br>(1.3s)  | -0.09<br>(8.6s)  |   | ns           | -0.02<br>(5.4s) | -0.08<br>(16.1s) | ↓   | <.001 - .015 |
|                   | 17 | 0.13<br>(27.2s) | -0.04<br>(17s)   |   | ns           | 0.04<br>(23.8s) | -0.04<br>(6.3s)  |     | ns           |

681

682

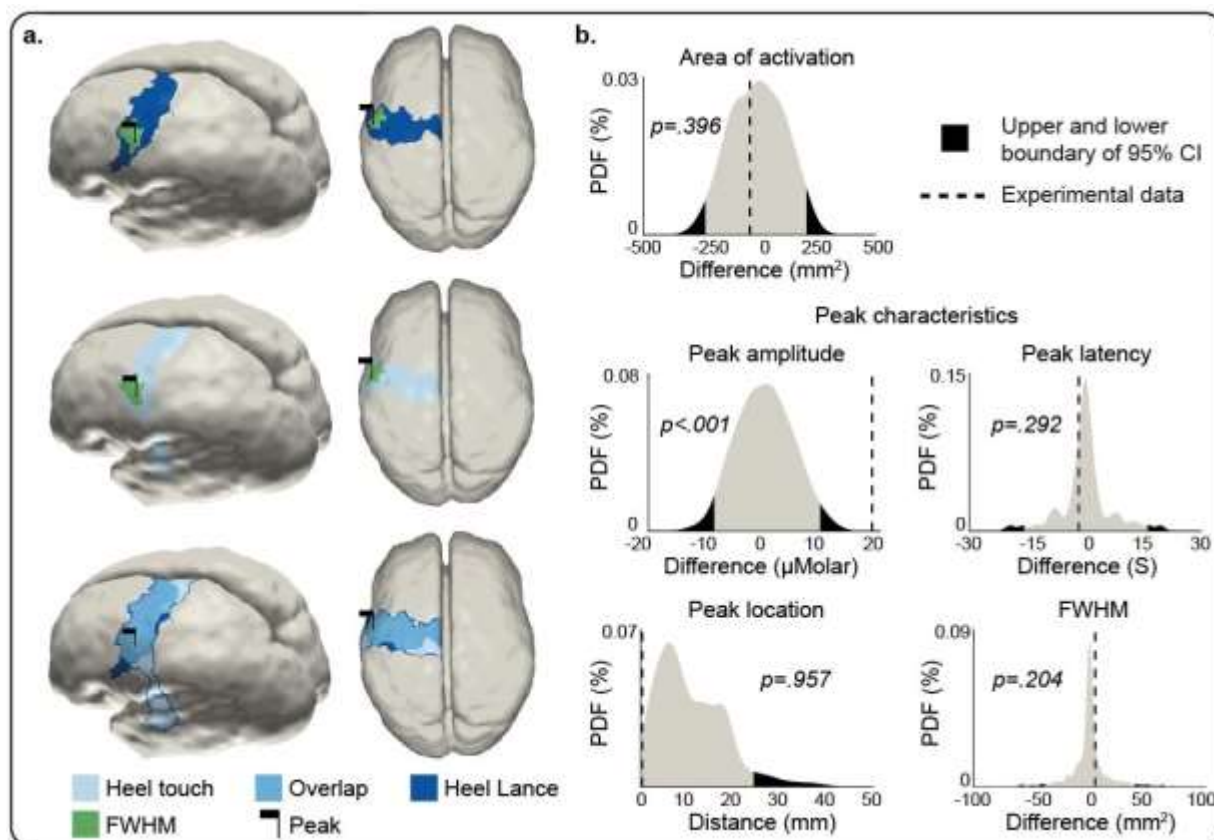

683  
684 **Figure 3 – figure supplement 1.**

685 **Average  $\Delta[Hb]$  during a heel lance and innocuous mechanical stimulation (touch) of**  
686 **the heel and comparison of the peak change.** Left (a): Average  $\Delta[Hb]$  following a heel  
687 lance and innocuous mechanical heel stimulation at the peak latency; Dark blue (lance) and  
688 pale blue (touch) patches represent the cluster of neighbouring nodes which are significantly  
689 larger (HbO) than baseline and mid blue is the area of overlap. Green patches represent the  
690 full width half maximum (FWHM) within these clusters. Black flags denote the location of the  
691 peak change. Right (b): Null distribution of the differences between amplitude, latency,  
692 location, and spread of the peak change, obtained with bootstrapping and phase scrambling  
693 (1000 iterations). Black shaded areas represent the 2.5 and 97.5 (or 95 for location)  
694 percentile of the distribution and black dashed lines represent the values obtained with the  
695 experimental data.

696 The equivalent plots for  $\Delta[Hb]$  are shown in Figure 3– figure supplement 1 and Figure 3–  
697 source data 1.

698  
699 **Figure 3 – Source Data 1.** Comparison of  $\Delta[HbO]$  and  $\Delta[Hb]$  between heel lance and heel  
700 touch

701 Parameter estimates for the  $\Delta[HbO]$  and  $\Delta[Hb]$  following a heel lance and heel touch, and p  
702 value from statistical comparison. The Euclidean distance between the heel touch and heel  
703 lance peak locations has been provided rather than x,y,z coordinates of each peak. Linked  
704 to Figure 3 and Supplementary Figure 1.

| Parameter                         | $\Delta[HbO]$ |            |         | $\Delta[Hb]$ |            |         |
|-----------------------------------|---------------|------------|---------|--------------|------------|---------|
|                                   | Lance         | Heel touch | p value | Lance        | Heel touch | p value |
| Overall spread (mm <sup>2</sup> ) | 396.18        | 235.11     | .088    | 287.93       | 329.46     | .396    |
| Peak amplitude ( $\mu$ M)         | 15.23         | 4.13       | .007    | 22.87        | 4.34       | <.001   |
| Peak latency (s)                  | 14.1          | 15.8       | .356    | 9.6          | 11.3       | .292    |

|                                |                           |       |                        |       |      |      |
|--------------------------------|---------------------------|-------|------------------------|-------|------|------|
| Peak location (mm)             | Euclidean distance = 1.63 | .776  | Euclidean distance = 0 | .959  |      |      |
| Peak spread (mm <sup>2</sup> ) | 66.63                     | 52.96 | .015                   | 87.86 | 83.1 | .204 |

705  
706
